# Supplementary material for: Elevated Fat Intake Increases Body Weight and the Risk of Overweight and Obesity among Chinese Adults: 1991–2015 Trends
Source: PubMed Central journal article supplement (PMC7694029; doi:10.3390/nu12113272), 2020-10-26
Supplement: nutrients-12-03272-s001.pdf [file nutrients-12-03272-s001.pdf]

**Table S1. Associations of fat intake with body weight, China Health and Nutrition Survey, 1991–2015**

| Variables                       | Coef.   | Std. Err. | z       | P> z  | [95% Conf. Interval] |         |
|---------------------------------|---------|-----------|---------|-------|----------------------|---------|
|                                 |         |           |         |       | Lower                | Upper   |
| Fat intake (10 g)               | 0.030   | 0.006     | 4.970   | 0.000 | 0.018                | 0.041   |
| Energy intake from nonfat (10%) | -0.002  | 0.004     | -0.460  | 0.648 | -0.010               | 0.007   |
| Height (cm)                     | 0.609   | 0.008     | 78.280  | 0.000 | 0.593                | 0.624   |
| Age (years)                     | 0.099   | 0.005     | 18.100  | 0.000 | 0.089                | 0.110   |
| Female                          | -1.929  | 0.164     | -11.760 | 0.000 | -2.250               | -1.607  |
| High School                     | 0.011   | 0.091     | 0.120   | 0.907 | -0.169               | 0.190   |
| Physical activities             |         |           |         |       |                      |         |
| Mid                             | -0.056  | 0.053     | -1.050  | 0.293 | -0.159               | 0.048   |
| High                            | -0.159  | 0.061     | -2.600  | 0.009 | -0.279               | -0.039  |
| Income                          |         |           |         |       |                      |         |
| Mid                             | 0.109   | 0.050     | 2.180   | 0.029 | 0.011                | 0.207   |
| High                            | 0.299   | 0.058     | 5.150   | 0.000 | 0.185                | 0.413   |
| Urban                           | 1.292   | 0.143     | 9.040   | 0.000 | 1.012                | 1.573   |
| Smoker                          | -0.543  | 0.077     | -7.010  | 0.000 | -0.695               | -0.391  |
| Drinker                         | 0.160   | 0.059     | 2.720   | 0.006 | 0.045                | 0.275   |
| Survey year                     |         |           |         |       |                      |         |
| 1993                            | 0.495   | 0.076     | 6.540   | 0.000 | 0.347                | 0.644   |
| 1997                            | 1.441   | 0.086     | 16.760  | 0.000 | 1.272                | 1.609   |
| 2000                            | 2.529   | 0.092     | 27.360  | 0.000 | 2.347                | 2.710   |
| 2004                            | 3.043   | 0.107     | 28.580  | 0.000 | 2.835                | 3.252   |
| 2006                            | 3.149   | 0.115     | 27.420  | 0.000 | 2.924                | 3.374   |
| 2009                            | 3.618   | 0.127     | 28.570  | 0.000 | 3.370                | 3.866   |
| 2011                            | 4.456   | 0.134     | 33.150  | 0.000 | 4.193                | 4.720   |
| 2015                            | 5.381   | 0.156     | 34.510  | 0.000 | 5.075                | 5.686   |
| _cons                           | -44.454 | 1.342     | -33.120 | 0.000 | -47.085              | -41.823 |

**Table S2. Associations of fat intake with body weight among men, China Health and Nutrition Survey, 1991–2015**

| Variables                       | Coef.   | Std.<br>Err. | z       | P> z  | [95% Conf. Interval] |         |
|---------------------------------|---------|--------------|---------|-------|----------------------|---------|
|                                 |         |              |         |       | Lower                | Upper   |
| Fat intake (10 g)               | 0.023   | 0.009        | 2.640   | 0.008 | 0.006                | 0.041   |
| Energy intake from nonfat (10%) | 0.000   | 0.006        | 0.010   | 0.991 | -0.012               | 0.012   |
| Height (cm)                     | 0.698   | 0.011        | 60.750  | 0.000 | 0.676                | 0.721   |
| Age (years)                     | 0.059   | 0.008        | 7.290   | 0.000 | 0.043                | 0.075   |
| High School                     | 0.437   | 0.132        | 3.310   | 0.001 | 0.178                | 0.695   |
| Physical activities             |         |              |         |       |                      |         |
| Mid                             | 0.040   | 0.081        | 0.490   | 0.624 | -0.120               | 0.199   |
| High                            | -0.152  | 0.096        | -1.590  | 0.112 | -0.340               | 0.035   |
| Income                          |         |              |         |       |                      |         |
| Mid                             | 0.133   | 0.078        | 1.710   | 0.088 | -0.020               | 0.285   |
| High                            | 0.382   | 0.090        | 4.230   | 0.000 | 0.205                | 0.559   |
| Urban                           | 2.015   | 0.213        | 9.440   | 0.000 | 1.596                | 2.433   |
| Smoker                          | -0.566  | 0.088        | -6.450  | 0.000 | -0.738               | -0.394  |
| Drinker                         | 0.293   | 0.077        | 3.810   | 0.000 | 0.142                | 0.444   |
| Survey year                     |         |              |         |       |                      |         |
| 1993                            | 0.697   | 0.118        | 5.910   | 0.000 | 0.466                | 0.928   |
| 1997                            | 1.724   | 0.132        | 13.060  | 0.000 | 1.465                | 1.983   |
| 2000                            | 3.031   | 0.142        | 21.410  | 0.000 | 2.753                | 3.308   |
| 2004                            | 3.846   | 0.162        | 23.720  | 0.000 | 3.528                | 4.163   |
| 2006                            | 4.127   | 0.174        | 23.660  | 0.000 | 3.785                | 4.469   |
| 2009                            | 4.763   | 0.191        | 24.960  | 0.000 | 4.389                | 5.137   |
| 2011                            | 5.836   | 0.203        | 28.770  | 0.000 | 5.438                | 6.233   |
| 2015                            | 7.044   | 0.235        | 29.960  | 0.000 | 6.583                | 7.505   |
| _cons                           | -59.081 | 1.983        | -29.790 | 0.000 | -62.969              | -55.194 |

**Table S3. Associations of fat intake with body weight among women, China Health and Nutrition Survey, 1991–2015**

| Variables                       | Coef.   | Std. Err. | z       | P> z  | [95% Conf. Interval] |         |
|---------------------------------|---------|-----------|---------|-------|----------------------|---------|
|                                 |         |           |         |       | Lower                | Upper   |
| Fat intake (10 g)               | 0.033   | 0.008     | 4.160   | 0.000 | 0.018                | 0.049   |
| Energy intake from nonfat (10%) | -0.002  | 0.006     | -0.360  | 0.720 | -0.014               | 0.010   |
| Height (cm)                     | 0.518   | 0.010     | 49.890  | 0.000 | 0.498                | 0.538   |
| Age (years)                     | 0.135   | 0.007     | 18.540  | 0.000 | 0.120                | 0.149   |
| High School                     | -0.462  | 0.126     | -3.660  | 0.000 | -0.709               | -0.214  |
| Physical activities             |         |           |         |       |                      |         |
| Mid                             | -0.167  | 0.068     | -2.440  | 0.015 | -0.301               | -0.033  |
| High                            | -0.257  | 0.079     | -3.270  | 0.001 | -0.411               | -0.103  |
| Income                          |         |           |         |       |                      |         |
| Mid                             | 0.093   | 0.064     | 1.450   | 0.146 | -0.032               | 0.219   |
| High                            | 0.232   | 0.075     | 3.100   | 0.002 | 0.085                | 0.378   |
| Urban                           | 0.619   | 0.188     | 3.290   | 0.001 | 0.250                | 0.987   |
| Smoker                          | -0.164  | 0.217     | -0.760  | 0.450 | -0.588               | 0.261   |
| Drinker                         | -0.088  | 0.094     | -0.930  | 0.351 | -0.272               | 0.097   |
| Survey year                     |         |           |         |       |                      |         |
| 1993                            | 0.323   | 0.097     | 3.320   | 0.001 | 0.133                | 0.514   |
| 1997                            | 1.190   | 0.111     | 10.680  | 0.000 | 0.972                | 1.409   |
| 2000                            | 2.078   | 0.120     | 17.320  | 0.000 | 1.843                | 2.313   |
| 2004                            | 2.321   | 0.139     | 16.710  | 0.000 | 2.049                | 2.593   |
| 2006                            | 2.278   | 0.150     | 15.190  | 0.000 | 1.984                | 2.572   |
| 2009                            | 2.607   | 0.166     | 15.690  | 0.000 | 2.282                | 2.933   |
| 2011                            | 3.258   | 0.176     | 18.490  | 0.000 | 2.913                | 3.604   |
| 2015                            | 3.933   | 0.204     | 19.250  | 0.000 | 3.533                | 4.334   |
| _cons                           | -32.528 | 1.675     | -19.420 | 0.000 | -35.812              | -29.245 |

**Table S4. Associations of fat intake with BMI, China Health and Nutrition Survey, 1991–2015**

| Variables                            | Coef.  | Std. Err. | z       | P> z  | [95% Conf. Interval] |        |
|--------------------------------------|--------|-----------|---------|-------|----------------------|--------|
|                                      |        |           |         |       | Lower                | Upper  |
| Fat intake (10 g)                    | 0.011  | 0.002     | 4.970   | 0.000 | 0.007                | 0.016  |
| Energy intake from nonfat (100 kcal) | -0.001 | 0.002     | -0.540  | 0.591 | -0.004               | 0.002  |
| Age (years)                          | 0.044  | 0.002     | 21.860  | 0.000 | 0.040                | 0.048  |
| Female                               | -0.125 | 0.053     | -2.350  | 0.019 | -0.229               | -0.021 |
| High School                          | -0.055 | 0.035     | -1.570  | 0.116 | -0.123               | 0.013  |
| Physical activities                  |        |           |         |       |                      |        |
| Mid                                  | -0.028 | 0.020     | -1.380  | 0.169 | -0.067               | 0.012  |
| High                                 | -0.072 | 0.023     | -3.090  | 0.002 | -0.118               | -0.026 |
| Income                               |        |           |         |       |                      |        |
| Mid                                  | 0.043  | 0.019     | 2.250   | 0.025 | 0.005                | 0.080  |
| High                                 | 0.106  | 0.022     | 4.760   | 0.000 | 0.062                | 0.149  |
| Urban                                | 0.381  | 0.054     | 7.110   | 0.000 | 0.276                | 0.485  |
| Smoker                               | -0.193 | 0.030     | -6.520  | 0.000 | -0.250               | -0.135 |
| Drinker                              | 0.048  | 0.022     | 2.130   | 0.033 | 0.004                | 0.092  |
| Survey year                          |        |           |         |       |                      |        |
| 1993                                 | 0.178  | 0.029     | 6.150   | 0.000 | 0.121                | 0.235  |
| 1997                                 | 0.522  | 0.033     | 15.990  | 0.000 | 0.458                | 0.586  |
| 2000                                 | 0.922  | 0.035     | 26.360  | 0.000 | 0.853                | 0.990  |
| 2004                                 | 1.090  | 0.040     | 27.190  | 0.000 | 1.012                | 1.169  |
| 2006                                 | 1.106  | 0.043     | 25.680  | 0.000 | 1.022                | 1.191  |
| 2009                                 | 1.256  | 0.047     | 26.560  | 0.000 | 1.163                | 1.349  |
| 2011                                 | 1.567  | 0.050     | 31.230  | 0.000 | 1.469                | 1.666  |
| 2015                                 | 1.897  | 0.058     | 32.610  | 0.000 | 1.783                | 2.011  |
| _cons                                | 20.111 | 0.091     | 221.110 | 0.000 | 19.932               | 20.289 |

**Table S5. Associations of fat intake with BMI among men, China Health and Nutrition Survey, 1991–2015**

| Variables                               | Coef.  | Std.<br>Err. | z       | P> z  | [95% Conf. Interval] |        |
|-----------------------------------------|--------|--------------|---------|-------|----------------------|--------|
|                                         |        |              |         |       | Lower                | Upper  |
| Fat intake (10 g)                       | 0.009  | 0.003        | 2.810   | 0.005 | 0.003                | 0.015  |
| Energy intake from nonfat<br>(100 kcal) | 0.000  | 0.002        | 0.010   | 0.995 | -0.004               | 0.004  |
| Age (years)                             | 0.024  | 0.003        | 8.620   | 0.000 | 0.019                | 0.030  |
| High School                             | 0.134  | 0.047        | 2.880   | 0.004 | 0.043                | 0.225  |
| Physical activities                     |        |              |         |       |                      |        |
| Mid                                     | 0.004  | 0.029        | 0.130   | 0.896 | -0.053               | 0.060  |
| High                                    | -0.061 | 0.034        | -1.790  | 0.074 | -0.127               | 0.006  |
| Income                                  |        |              |         |       |                      |        |
| Mid                                     | 0.048  | 0.028        | 1.730   | 0.084 | -0.006               | 0.102  |
| High                                    | 0.133  | 0.032        | 4.150   | 0.000 | 0.070                | 0.195  |
| Urban                                   | 0.661  | 0.074        | 8.890   | 0.000 | 0.515                | 0.806  |
| Smoker                                  | -0.203 | 0.031        | -6.500  | 0.000 | -0.264               | -0.142 |
| Drinker                                 | 0.098  | 0.027        | 3.600   | 0.000 | 0.045                | 0.152  |
| Survey year                             |        |              |         |       |                      |        |
| 1993                                    | 0.245  | 0.042        | 5.850   | 0.000 | 0.163                | 0.327  |
| 1997                                    | 0.603  | 0.047        | 12.910  | 0.000 | 0.511                | 0.694  |
| 2000                                    | 1.064  | 0.050        | 21.330  | 0.000 | 0.966                | 1.161  |
| 2004                                    | 1.340  | 0.057        | 23.580  | 0.000 | 1.228                | 1.451  |
| 2006                                    | 1.427  | 0.061        | 23.420  | 0.000 | 1.307                | 1.546  |
| 2009                                    | 1.638  | 0.066        | 24.700  | 0.000 | 1.508                | 1.768  |
| 2011                                    | 2.014  | 0.070        | 28.570  | 0.000 | 1.876                | 2.152  |
| 2015                                    | 2.443  | 0.082        | 29.910  | 0.000 | 2.283                | 2.603  |
| _cons                                   | 20.505 | 0.119        | 172.030 | 0.000 | 20.271               | 20.738 |

**Table S6. Associations of fat intake with BMI among women, China Health and Nutrition Survey, 1991–2015**

| Variables                               | Coef.  | Std.<br>Err. | z       | P> z  | [95% Conf. Interval] |        |
|-----------------------------------------|--------|--------------|---------|-------|----------------------|--------|
|                                         |        |              |         |       | Lower                | Upper  |
| Fat intake (10 g)                       | 0.014  | 0.003        | 4.080   | 0.000 | 0.007                | 0.020  |
| Energy intake from nonfat<br>(100 kcal) | -0.002 | 0.002        | -0.770  | 0.441 | -0.007               | 0.003  |
| Age (years)                             | 0.063  | 0.003        | 21.640  | 0.000 | 0.057                | 0.068  |
| High School                             | -0.253 | 0.052        | -4.890  | 0.000 | -0.354               | -0.151 |
| Physical activities                     |        |              |         |       |                      |        |
| Mid                                     | -0.055 | 0.028        | -1.950  | 0.052 | -0.110               | 0.000  |
| High                                    | -0.088 | 0.032        | -2.720  | 0.007 | -0.151               | -0.024 |
| Income                                  |        |              |         |       |                      |        |
| Mid                                     | 0.040  | 0.026        | 1.520   | 0.128 | -0.012               | 0.092  |
| High                                    | 0.084  | 0.031        | 2.740   | 0.006 | 0.024                | 0.144  |
| Urban                                   | 0.136  | 0.076        | 1.800   | 0.072 | -0.012               | 0.284  |
| Smoker                                  | -0.110 | 0.089        | -1.240  | 0.217 | -0.284               | 0.064  |
| Drinker                                 | -0.035 | 0.039        | -0.920  | 0.359 | -0.111               | 0.040  |
| Survey year                             |        |              |         |       |                      |        |
| 1993                                    | 0.118  | 0.040        | 2.960   | 0.003 | 0.040                | 0.197  |
| 1997                                    | 0.445  | 0.046        | 9.750   | 0.000 | 0.356                | 0.535  |
| 2000                                    | 0.788  | 0.049        | 16.120  | 0.000 | 0.693                | 0.884  |
| 2004                                    | 0.860  | 0.056        | 15.270  | 0.000 | 0.749                | 0.970  |
| 2006                                    | 0.812  | 0.061        | 13.420  | 0.000 | 0.694                | 0.931  |
| 2009                                    | 0.909  | 0.067        | 13.610  | 0.000 | 0.778                | 1.040  |
| 2011                                    | 1.167  | 0.071        | 16.490  | 0.000 | 1.028                | 1.306  |
| 2015                                    | 1.406  | 0.082        | 17.150  | 0.000 | 1.245                | 1.567  |
| _cons                                   | 19.623 | 0.118        | 165.790 | 0.000 | 19.391               | 19.855 |

**Table S7. Associations of energy intake from fat with body weight, China Health and Nutrition Survey, 1991–2015**

| Variables                      | Coef.   | Std.<br>Err. | z       | P> z  | [95% Conf. Interval] |         |
|--------------------------------|---------|--------------|---------|-------|----------------------|---------|
|                                |         |              |         |       | Lower                | Upper   |
| Energy intake from fat (10%)   | 0.092   | 0.021        | 4.350   | 0.000 | 0.051                | 0.133   |
| Total energy intake (100 kcal) | 0.009   | 0.003        | 2.680   | 0.007 | 0.002                | 0.015   |
| Height (cm)                    | 0.609   | 0.008        | 78.270  | 0.000 | 0.593                | 0.624   |
| Age (years)                    | 0.099   | 0.005        | 18.110  | 0.000 | 0.089                | 0.110   |
| Female                         | -1.929  | 0.164        | -11.760 | 0.000 | -2.251               | -1.608  |
| High School                    | 0.009   | 0.091        | 0.100   | 0.918 | -0.170               | 0.189   |
| Physical activities            |         |              |         |       |                      |         |
| Mid                            | -0.056  | 0.053        | -1.060  | 0.290 | -0.159               | 0.048   |
| High                           | -0.159  | 0.061        | -2.600  | 0.009 | -0.279               | -0.039  |
| Income                         |         |              |         |       |                      |         |
| Mid                            | 0.109   | 0.050        | 2.180   | 0.030 | 0.011                | 0.207   |
| High                           | 0.300   | 0.058        | 5.170   | 0.000 | 0.186                | 0.414   |
| Urban                          | 1.291   | 0.143        | 9.030   | 0.000 | 1.011                | 1.571   |
| Smoker                         | -0.544  | 0.077        | -7.020  | 0.000 | -0.696               | -0.392  |
| Drinker                        | 0.159   | 0.059        | 2.710   | 0.007 | 0.044                | 0.275   |
| Survey year                    |         |              |         |       |                      |         |
| 1993                           | 0.498   | 0.076        | 6.580   | 0.000 | 0.350                | 0.646   |
| 1997                           | 1.445   | 0.086        | 16.860  | 0.000 | 1.277                | 1.613   |
| 2000                           | 2.536   | 0.092        | 27.620  | 0.000 | 2.356                | 2.716   |
| 2004                           | 3.052   | 0.106        | 28.800  | 0.000 | 2.844                | 3.259   |
| 2006                           | 3.154   | 0.114        | 27.570  | 0.000 | 2.929                | 3.378   |
| 2009                           | 3.621   | 0.126        | 28.700  | 0.000 | 3.374                | 3.868   |
| 2011                           | 4.451   | 0.134        | 33.150  | 0.000 | 4.188                | 4.714   |
| 2015                           | 5.374   | 0.156        | 34.490  | 0.000 | 5.069                | 5.680   |
| _cons                          | -44.731 | 1.342        | -33.330 | 0.000 | -47.361              | -42.101 |

**Table S8. Associations of energy intake from fat with body weight among men, China Health and Nutrition Survey, 1991–2015**

| Variables                      | Coef.   | Std.<br>Err. | z       | P> z  | [95% Conf. Interval] |         |
|--------------------------------|---------|--------------|---------|-------|----------------------|---------|
|                                |         |              |         |       | Lower                | Upper   |
| Energy intake from fat (10%)   | 0.092   | 0.033        | 2.770   | 0.006 | 0.027                | 0.157   |
| Total energy intake (100 kcal) | 0.008   | 0.005        | 1.610   | 0.108 | -0.002               | 0.017   |
| Height (cm)                    | 0.698   | 0.011        | 60.750  | 0.000 | 0.676                | 0.721   |
| Age (years)                    | 0.059   | 0.008        | 7.290   | 0.000 | 0.043                | 0.075   |
| High School                    | 0.435   | 0.132        | 3.290   | 0.001 | 0.176                | 0.693   |
| Physical activities            |         |              |         |       |                      |         |
| Mid                            | 0.041   | 0.081        | 0.500   | 0.616 | -0.119               | 0.200   |
| High                           | -0.151  | 0.096        | -1.570  | 0.116 | -0.338               | 0.037   |
| Income                         |         |              |         |       |                      |         |
| Mid                            | 0.130   | 0.078        | 1.670   | 0.094 | -0.022               | 0.282   |
| High                           | 0.380   | 0.090        | 4.210   | 0.000 | 0.203                | 0.557   |
| Urban                          | 2.006   | 0.213        | 9.400   | 0.000 | 1.588                | 2.424   |
| Smoker                         | -0.567  | 0.088        | -6.450  | 0.000 | -0.739               | -0.395  |
| Drinker                        | 0.293   | 0.077        | 3.800   | 0.000 | 0.142                | 0.444   |
| Survey year                    |         |              |         |       |                      |         |
| 1993                           | 0.696   | 0.118        | 5.900   | 0.000 | 0.465                | 0.927   |
| 1997                           | 1.719   | 0.132        | 13.050  | 0.000 | 1.460                | 1.977   |
| 2000                           | 3.024   | 0.141        | 21.500  | 0.000 | 2.748                | 3.299   |
| 2004                           | 3.839   | 0.161        | 23.820  | 0.000 | 3.523                | 4.155   |
| 2006                           | 4.115   | 0.174        | 23.700  | 0.000 | 3.775                | 4.455   |
| 2009                           | 4.747   | 0.190        | 25.000  | 0.000 | 4.375                | 5.119   |
| 2011                           | 5.810   | 0.202        | 28.710  | 0.000 | 5.413                | 6.206   |
| 2015                           | 7.014   | 0.235        | 29.870  | 0.000 | 6.554                | 7.474   |
| _cons                          | -59.318 | 1.983        | -29.920 | 0.000 | -63.204              | -55.432 |



**Table S9. Associations of energy intake from fat with body weight among women, China Health and Nutrition Survey, 1991–2015**

| Variables                      | Coef.   | Std.<br>Err. | z       | P> z  | [95% Conf. Interval] |         |
|--------------------------------|---------|--------------|---------|-------|----------------------|---------|
|                                |         |              |         |       | Lower                | Upper   |
| Energy intake from fat (10%)   | 0.098   | 0.027        | 3.620   | 0.000 | 0.045                | 0.150   |
| Total energy intake (100 kcal) | 0.010   | 0.004        | 2.240   | 0.025 | 0.001                | 0.019   |
| Height (cm)                    | 0.518   | 0.010        | 49.870  | 0.000 | 0.497                | 0.538   |
| Age (years)                    | 0.135   | 0.007        | 18.550  | 0.000 | 0.121                | 0.149   |
| High School                    | -0.463  | 0.126        | -3.670  | 0.000 | -0.711               | -0.216  |
| Physical activities            |         |              |         |       |                      |         |
| Mid                            | -0.167  | 0.068        | -2.430  | 0.015 | -0.301               | -0.032  |
| High                           | -0.257  | 0.079        | -3.270  | 0.001 | -0.411               | -0.103  |
| Income                         |         |              |         |       |                      |         |
| Mid                            | 0.094   | 0.064        | 1.460   | 0.145 | -0.032               | 0.219   |
| High                           | 0.233   | 0.075        | 3.120   | 0.002 | 0.086                | 0.379   |
| Urban                          | 0.617   | 0.188        | 3.280   | 0.001 | 0.249                | 0.986   |
| Smoker                         | -0.161  | 0.217        | -0.740  | 0.457 | -0.586               | 0.264   |
| Drinker                        | -0.088  | 0.094        | -0.940  | 0.347 | -0.273               | 0.096   |
| Survey year                    |         |              |         |       |                      |         |
| 1993                           | 0.325   | 0.097        | 3.340   | 0.001 | 0.134                | 0.515   |
| 1997                           | 1.196   | 0.111        | 10.750  | 0.000 | 0.978                | 1.414   |
| 2000                           | 2.085   | 0.119        | 17.490  | 0.000 | 1.852                | 2.319   |
| 2004                           | 2.329   | 0.138        | 16.850  | 0.000 | 2.058                | 2.600   |
| 2006                           | 2.282   | 0.149        | 15.270  | 0.000 | 1.989                | 2.575   |
| 2009                           | 2.609   | 0.166        | 15.750  | 0.000 | 2.285                | 2.934   |
| 2011                           | 3.251   | 0.176        | 18.460  | 0.000 | 2.906                | 3.597   |
| 2015                           | 3.926   | 0.204        | 19.220  | 0.000 | 3.525                | 4.326   |
| _cons                          | -32.815 | 1.675        | -19.590 | 0.000 | -36.098              | -29.532 |

**Table S10. Associations of energy intake from fat with BMI, China Health and Nutrition Survey, 1991–2015**

| Variables                      | Coef.  | Std.<br>Err. | z       | P> z  | [95% Conf. Interval] |        |
|--------------------------------|--------|--------------|---------|-------|----------------------|--------|
|                                |        |              |         |       | Lower                | Upper  |
| Energy intake from fat(10%)    | 0.038  | 0.008        | 4.680   | 0.000 | 0.022                | 0.054  |
| Total energy intake (100 kcal) | 0.003  | 0.001        | 2.600   | 0.009 | 0.001                | 0.006  |
| Age (years)                    | 0.044  | 0.002        | 21.870  | 0.000 | 0.040                | 0.048  |
| Female                         | -0.125 | 0.053        | -2.360  | 0.018 | -0.229               | -0.021 |
| High School                    | -0.055 | 0.035        | -1.590  | 0.112 | -0.123               | 0.013  |
| Physical activities            |        |              |         |       |                      |        |
| Mid                            | -0.028 | 0.020        | -1.370  | 0.170 | -0.067               | 0.012  |
| High                           | -0.072 | 0.023        | -3.080  | 0.002 | -0.118               | -0.026 |
| Income                         |        |              |         |       |                      |        |
| Mid                            | 0.042  | 0.019        | 2.230   | 0.026 | 0.005                | 0.080  |
| High                           | 0.106  | 0.022        | 4.770   | 0.000 | 0.062                | 0.149  |
| Urban                          | 0.379  | 0.054        | 7.080   | 0.000 | 0.274                | 0.484  |
| Smoker                         | -0.193 | 0.030        | -6.530  | 0.000 | -0.251               | -0.135 |
| Drinker                        | 0.047  | 0.022        | 2.110   | 0.035 | 0.003                | 0.091  |
| Survey year                    |        |              |         |       |                      |        |
| 1993                           | 0.178  | 0.029        | 6.180   | 0.000 | 0.122                | 0.235  |
| 1997                           | 0.523  | 0.033        | 16.050  | 0.000 | 0.459                | 0.587  |
| 2000                           | 0.923  | 0.035        | 26.560  | 0.000 | 0.855                | 0.991  |
| 2004                           | 1.092  | 0.040        | 27.370  | 0.000 | 1.014                | 1.170  |
| 2006                           | 1.106  | 0.043        | 25.790  | 0.000 | 1.022                | 1.190  |
| 2009                           | 1.255  | 0.047        | 26.630  | 0.000 | 1.162                | 1.347  |
| 2011                           | 1.562  | 0.050        | 31.170  | 0.000 | 1.464                | 1.661  |
| 2015                           | 1.891  | 0.058        | 32.540  | 0.000 | 1.777                | 2.005  |
| _cons                          | 19.996 | 0.091        | 220.340 | 0.000 | 19.818               | 20.174 |

**Table S11. Associations of energy intake from fat with BMI among men, China Health and Nutrition Survey, 1991–2015**

| Variables                      | Coef.  | Std.<br>Err. | z       | P> z  | [95% Conf. Interval] |        |
|--------------------------------|--------|--------------|---------|-------|----------------------|--------|
|                                |        |              |         |       | Lower                | Upper  |
| Energy intake from fat(10%)    | 0.035  | 0.012        | 2.960   | 0.003 | 0.012                | 0.058  |
| Total energy intake (100 kcal) | 0.003  | 0.002        | 1.700   | 0.089 | 0.000                | 0.006  |
| Age (years)                    | 0.024  | 0.003        | 8.610   | 0.000 | 0.019                | 0.030  |
| High School                    | 0.133  | 0.047        | 2.860   | 0.004 | 0.042                | 0.225  |
| Physical activities            |        |              |         |       |                      |        |
| Mid                            | 0.004  | 0.029        | 0.140   | 0.886 | -0.052               | 0.061  |
| High                           | -0.060 | 0.034        | -1.770  | 0.077 | -0.127               | 0.006  |
| Income                         |        |              |         |       |                      |        |
| Mid                            | 0.047  | 0.028        | 1.690   | 0.091 | -0.007               | 0.101  |
| High                           | 0.132  | 0.032        | 4.120   | 0.000 | 0.069                | 0.195  |
| Urban                          | 0.657  | 0.074        | 8.840   | 0.000 | 0.511                | 0.803  |
| Smoker                         | -0.203 | 0.031        | -6.510  | 0.000 | -0.264               | -0.142 |
| Drinker                        | 0.098  | 0.027        | 3.590   | 0.000 | 0.045                | 0.152  |
| Survey year                    |        |              |         |       |                      |        |
| 1993                           | 0.244  | 0.042        | 5.840   | 0.000 | 0.162                | 0.326  |
| 1997                           | 0.601  | 0.047        | 12.900  | 0.000 | 0.510                | 0.692  |
| 2000                           | 1.061  | 0.050        | 21.420  | 0.000 | 0.964                | 1.158  |
| 2004                           | 1.337  | 0.056        | 23.670  | 0.000 | 1.226                | 1.448  |
| 2006                           | 1.422  | 0.061        | 23.460  | 0.000 | 1.303                | 1.541  |
| 2009                           | 1.632  | 0.066        | 24.720  | 0.000 | 1.503                | 1.762  |
| 2011                           | 2.004  | 0.070        | 28.480  | 0.000 | 1.866                | 2.142  |
| 2015                           | 2.431  | 0.082        | 29.800  | 0.000 | 2.271                | 2.591  |
| _cons                          | 20.410 | 0.119        | 171.020 | 0.000 | 20.176               | 20.643 |

**Table S12. Associations of energy intake from fat with BMI among women, China Health and Nutrition Survey, 1991–2015**

| Variables                      | Coef.  | Std.<br>Err. | z       | P> z  | [95% Conf. Interval] |        |
|--------------------------------|--------|--------------|---------|-------|----------------------|--------|
|                                |        |              |         |       | Lower                | Upper  |
| Energy intake from fat (10%)   | 0.041  | 0.011        | 3.720   | 0.000 | 0.020                | 0.063  |
| Total energy intake (100 kcal) | 0.003  | 0.002        | 1.850   | 0.065 | 0.000                | 0.007  |
| Age (years)                    | 0.063  | 0.003        | 21.650  | 0.000 | 0.057                | 0.068  |
| High School                    | -0.253 | 0.052        | -4.910  | 0.000 | -0.354               | -0.152 |
| Physical activities            |        |              |         |       |                      |        |
| Mid                            | -0.055 | 0.028        | -1.950  | 0.051 | -0.110               | 0.000  |
| High                           | -0.088 | 0.032        | -2.730  | 0.006 | -0.151               | -0.025 |
| Income                         |        |              |         |       |                      |        |
| Mid                            | 0.040  | 0.026        | 1.530   | 0.127 | -0.011               | 0.092  |
| High                           | 0.085  | 0.031        | 2.760   | 0.006 | 0.025                | 0.145  |
| Urban                          | 0.136  | 0.076        | 1.790   | 0.073 | -0.013               | 0.284  |
| Smoker                         | -0.109 | 0.089        | -1.220  | 0.221 | -0.283               | 0.066  |
| Drinker                        | -0.036 | 0.039        | -0.920  | 0.355 | -0.112               | 0.040  |
| Survey year                    |        |              |         |       |                      |        |
| 1993                           | 0.119  | 0.040        | 2.980   | 0.003 | 0.041                | 0.197  |
| 1997                           | 0.448  | 0.046        | 9.830   | 0.000 | 0.359                | 0.537  |
| 2000                           | 0.792  | 0.049        | 16.300  | 0.000 | 0.697                | 0.888  |
| 2004                           | 0.864  | 0.056        | 15.430  | 0.000 | 0.754                | 0.974  |
| 2006                           | 0.815  | 0.060        | 13.510  | 0.000 | 0.697                | 0.933  |
| 2009                           | 0.911  | 0.067        | 13.680  | 0.000 | 0.780                | 1.041  |
| 2011                           | 1.165  | 0.071        | 16.470  | 0.000 | 1.026                | 1.304  |
| 2015                           | 1.404  | 0.082        | 17.140  | 0.000 | 1.244                | 1.565  |
| _cons                          | 19.490 | 0.118        | 164.920 | 0.000 | 19.259               | 19.722 |

**Table S13. Associations of a high-fat diet (energy intake from fat > 30%) with the risk of overweight and obesity, China Health and Nutrition Survey, 1991–2015**

| Variables                      |      | Odds Ratio | Std. Err. | z       | P> z  | [95% Conf. Interval] |        |
|--------------------------------|------|------------|-----------|---------|-------|----------------------|--------|
|                                |      |            |           |         |       | Lower                | Upper  |
| High-fat diet                  |      | 1.132      | 0.047     | 2.980   | 0.003 | 1.043                | 1.228  |
| Total energy intake (100 kcal) |      | 1.004      | 0.003     | 1.380   | 0.167 | 0.998                | 1.010  |
| Age (years)                    |      | 1.064      | 0.004     | 17.860  | 0.000 | 1.057                | 1.071  |
| Female                         |      | 0.818      | 0.075     | -2.180  | 0.029 | 0.683                | 0.980  |
| High School                    |      | 0.812      | 0.060     | -2.840  | 0.004 | 0.703                | 0.937  |
| Physical activities            |      |            |           |         |       |                      |        |
|                                | Mid  | 0.871      | 0.042     | -2.840  | 0.004 | 0.792                | 0.958  |
|                                | High | 0.791      | 0.044     | -4.190  | 0.000 | 0.709                | 0.883  |
| Income                         |      |            |           |         |       |                      |        |
|                                | Mid  | 1.124      | 0.054     | 2.430   | 0.015 | 1.023                | 1.236  |
|                                | High | 1.280      | 0.069     | 4.560   | 0.000 | 1.151                | 1.423  |
| Urban                          |      | 1.770      | 0.158     | 6.380   | 0.000 | 1.485                | 2.109  |
| Smoker                         |      | 0.722      | 0.049     | -4.780  | 0.000 | 0.631                | 0.825  |
| Drinker                        |      | 1.068      | 0.059     | 1.190   | 0.233 | 0.959                | 1.189  |
| Survey year                    |      |            |           |         |       |                      |        |
|                                | 1993 | 1.378      | 0.121     | 3.650   | 0.000 | 1.160                | 1.637  |
|                                | 1997 | 2.873      | 0.264     | 11.490  | 0.000 | 2.400                | 3.440  |
|                                | 2000 | 5.608      | 0.514     | 18.830  | 0.000 | 4.687                | 6.711  |
|                                | 2004 | 7.642      | 0.745     | 20.870  | 0.000 | 6.313                | 9.251  |
|                                | 2006 | 7.354      | 0.739     | 19.860  | 0.000 | 6.039                | 8.954  |
|                                | 2009 | 9.678      | 1.016     | 21.610  | 0.000 | 7.878                | 11.890 |
|                                | 2011 | 14.614     | 1.583     | 24.770  | 0.000 | 11.819               | 18.070 |
|                                | 2015 | 23.516     | 2.813     | 26.400  | 0.000 | 18.602               | 29.729 |
| _cons                          |      | 0.001      | 0.000     | -38.340 | 0.000 | 0.000                | 0.001  |

**Table S14. Associations of a high-fat diet (energy intake from fat > 30%) with the risk of overweight and obesity, China Health and Nutrition Survey, 1991–2015**

| Variables                      |      | Odds Ratio | Std. Err. | z       | P> z  | [95% Conf. Interval] |         |
|--------------------------------|------|------------|-----------|---------|-------|----------------------|---------|
|                                |      |            |           |         |       | Lower                | Upper   |
| High-fat diet                  |      | 1.140      | 0.070     | 2.140   | 0.032 | 1.011                | 1.285   |
| Total energy intake (100 kcal) |      | 1.002      | 0.004     | 0.570   | 0.567 | 0.994                | 1.011   |
| Age (years)                    |      | 1.033      | 0.005     | 6.490   | 0.000 | 1.023                | 1.043   |
| High School                    |      | 1.125      | 0.113     | 1.170   | 0.242 | 0.924                | 1.369   |
| Physical activities            |      |            |           |         |       |                      |         |
|                                | Mid  | 0.808      | 0.057     | -3.010  | 0.003 | 0.703                | 0.928   |
|                                | High | 0.657      | 0.056     | -4.940  | 0.000 | 0.556                | 0.776   |
| Income                         |      |            |           |         |       |                      |         |
|                                | Mid  | 1.154      | 0.084     | 1.970   | 0.049 | 1.001                | 1.331   |
|                                | High | 1.400      | 0.113     | 4.150   | 0.000 | 1.194                | 1.641   |
| Urban                          |      | 2.791      | 0.362     | 7.900   | 0.000 | 2.164                | 3.600   |
| Smoker                         |      | 0.719      | 0.053     | -4.470  | 0.000 | 0.622                | 0.831   |
| Drinker                        |      | 1.183      | 0.082     | 2.440   | 0.015 | 1.033                | 1.354   |
| Survey year                    |      |            |           |         |       |                      |         |
|                                | 1993 | 1.562      | 0.220     | 3.160   | 0.002 | 1.184                | 2.059   |
|                                | 1997 | 3.812      | 0.558     | 9.140   | 0.000 | 2.862                | 5.079   |
|                                | 2000 | 9.487      | 1.380     | 15.460  | 0.000 | 7.133                | 12.618  |
|                                | 2004 | 15.082     | 2.328     | 17.580  | 0.000 | 11.145               | 20.410  |
|                                | 2006 | 16.620     | 2.631     | 17.750  | 0.000 | 12.186               | 22.666  |
|                                | 2009 | 25.197     | 4.133     | 19.670  | 0.000 | 18.270               | 34.750  |
|                                | 2011 | 41.598     | 7.078     | 21.910  | 0.000 | 29.802               | 58.063  |
|                                | 2015 | 84.250     | 15.761    | 23.700  | 0.000 | 58.389               | 121.565 |
| _cons                          |      | 0.001      | 0.000     | -26.020 | 0.000 | 0.000                | 0.001   |

**Table S15. Associations of a high-fat diet (energy intake from fat > 30%) with the risk of overweight and obesity among women, China Health and Nutrition Survey, 1991–2015**

| Variables                      |      | Odds Ratio | Std. Err. | z       | P> z  | [95% Conf. Interval] |        |
|--------------------------------|------|------------|-----------|---------|-------|----------------------|--------|
|                                |      |            |           |         |       | Lower                | Upper  |
| High-fat diet                  |      | 1.130      | 0.064     | 2.160   | 0.031 | 1.012                | 1.262  |
| Total energy intake (100 kcal) |      | 1.006      | 0.004     | 1.320   | 0.188 | 0.997                | 1.015  |
| Age (years)                    |      | 1.092      | 0.005     | 18.090  | 0.000 | 1.082                | 1.103  |
| High School                    |      | 0.548      | 0.059     | -5.550  | 0.000 | 0.443                | 0.678  |
| Physical activities            |      |            |           |         |       |                      |        |
|                                | Mid  | 0.916      | 0.061     | -1.320  | 0.187 | 0.804                | 1.044  |
|                                | High | 0.869      | 0.065     | -1.870  | 0.061 | 0.750                | 1.007  |
| Income                         |      |            |           |         |       |                      |        |
|                                | Mid  | 1.107      | 0.071     | 1.580   | 0.115 | 0.976                | 1.255  |
|                                | High | 1.194      | 0.087     | 2.440   | 0.015 | 1.035                | 1.377  |
| Urban                          |      | 1.185      | 0.146     | 1.380   | 0.168 | 0.931                | 1.509  |
| Smoker                         |      | 0.932      | 0.184     | -0.360  | 0.722 | 0.633                | 1.373  |
| Drinker                        |      | 0.920      | 0.086     | -0.890  | 0.375 | 0.766                | 1.106  |
| Survey year                    |      |            |           |         |       |                      |        |
|                                | 1993 | 1.265      | 0.142     | 2.090   | 0.037 | 1.015                | 1.577  |
|                                | 1997 | 2.329      | 0.277     | 7.110   | 0.000 | 1.845                | 2.940  |
|                                | 2000 | 3.774      | 0.450     | 11.150  | 0.000 | 2.988                | 4.767  |
|                                | 2004 | 4.524      | 0.577     | 11.830  | 0.000 | 3.523                | 5.810  |
|                                | 2006 | 3.864      | 0.511     | 10.220  | 0.000 | 2.982                | 5.008  |
|                                | 2009 | 4.496      | 0.628     | 10.760  | 0.000 | 3.419                | 5.911  |
|                                | 2011 | 6.326      | 0.907     | 12.870  | 0.000 | 4.776                | 8.378  |
|                                | 2015 | 8.292      | 1.316     | 13.330  | 0.000 | 6.075                | 11.318 |
| _cons                          |      | 0.000      | 0.000     | -32.250 | 0.000 | 0.000                | 0.000  |
